# 1 Activity in primate visual cortex is minimally driven by spontaneous 2 movements

3

4 Bharath C. Talluri<sup>1+</sup>, Incheol Kang<sup>1+</sup>, Adam Lazere<sup>1</sup>, Katrina R. Quinn<sup>2</sup>, Nicholas Kaliss<sup>1</sup>, Jacob L. Yates<sup>3,4</sup>,  
5 Daniel A. Butts<sup>4</sup>, Hendrikje Nienborg<sup>1\*</sup>

6

7 <sup>1</sup> Laboratory of Sensorimotor Research, National Eye Institute, National Institutes of Health, Bethesda,  
8 USA

9 <sup>2</sup> Center for Integrative Neuroscience, University of Tübingen, Tübingen, Germany

10 <sup>3</sup> Herbert Wertheim School of Optometry & Vision Science, University of California, Berkeley, USA

11 <sup>4</sup> Department of Biology and Program in Neuroscience and Cognitive Science, University of Maryland,  
12 College Park, USA

13

14 \*Corresponding author: [hendrikje.nienborg@nih.gov](mailto:hendrikje.nienborg@nih.gov)

15 +These authors contributed equally to this work.

16

## 17 Abstract

18

19 Organisms process sensory information in the context of their own moving bodies, an  
20 idea referred to as embodiment. This idea is important for developmental neuroscience,  
21 and increasingly plays a role in robotics and systems neuroscience. The mechanisms that  
22 support such embodiment are unknown, but a manifestation could be the observation in  
23 mice of brain-wide neuromodulation, including in the primary visual cortex, driven by task-  
24 irrelevant spontaneous body movements. Here we tested this hypothesis in macaque  
25 monkeys, a primate model for human vision, by simultaneously recording visual cortex  
26 activity and facial and body movements. Activity in the visual cortex (V1, V2, V3/V3A) was  
27 associated with the animals' own movements, but this modulation was largely explained  
28 by the impact of the movements on the retinal image. These results suggest that  
29 embodiment in primate vision may be realized by input provided by the eyes themselves.

30

31 Organisms process sensory information not in isolation but within the context of a moving  
32 body that is interacting with the environment, a phenomenon whose importance is  
33 underscored in developmental neuroscience<sup>1</sup>, and in robotics and artificial intelligence<sup>2</sup>,  
34 from vacuum-cleaning robots to self-driving cars<sup>3</sup> (see also Fei-Fei, L, Montreal AI Debate  
35 2: <https://www.youtube.com/watch?v=XY1VTLRIsNo>). A longstanding question in  
36 systems neuroscience is the degree to which this embodiment influences sensory  
37 processing<sup>4–6</sup>. In mice, locomotion affects neural activity in primary visual cortex (V1)<sup>7–18</sup>  
38 and spontaneous movements are associated with pronounced brain-wide activity,  
39 including in V1<sup>19–21</sup>. The work in mice suggests that embodiment plays a crucial role in  
40 shaping processing in the visual cortex, although it is unclear whether similar phenomena  
41 are observed in other species<sup>22–24</sup>. The degree to which such movements influence  
42 responses in the primate visual cortex is of interest for several reasons. First, it could be  
43 a direct observation of embodiment that can be dissected into mechanisms and probed  
44 to understand its computational principles. Second, it addresses a fundamental question  
45 about the functional organization and degree of modularity of the primate cerebral  
46 cortex<sup>23</sup>. And third, it could have far-reaching implications for the interpretation of past  
47 neurophysiological studies of the primate visual system, in which the animals’  
48 spontaneous body movements were not monitored.

49

50 Here, we ask whether the animal’s own body movements are associated with modulations  
51 of neural activity in visual cortex of macaque monkeys. We mirrored the experimental  
52 approaches used in studies in mice to facilitate the comparison between the data in mice  
53 and the data in primates: we used videography to monitor the animals’ movements<sup>19,20</sup>,  
54 and statistical modeling<sup>20,21</sup> to relate the movements to neural spiking activity recorded in  
55 visual cortex (V1, V2, V3/V3A). Consistent with the results observed in mice, we found  
56 activity associated with the animals’ own spontaneous body movements. But when  
57 accounting for the fact that some of these movements also changed the retinal input to  
58 the neurons in visual cortex, this movement-related activity largely disappeared. As a  
59 model-free approach we also compared the modulation by spatial attention with the  
60 modulation by the animals’ own movements. The modulation by movement was an order  
61 of magnitude smaller than that by attention, and not associated with the modulation by  
62 attention. We conclude that in macaque early and mid-level visual cortex, activity is  
63 minimally driven by the animal’s own spontaneous body movements.

64

## 65 **Results**

### 66 **The macaque monkeys move spontaneously while performing visual tasks**

67 We used multichannel extracellular recordings targeting V1, V2 and V3/V3A combined  
68 with video-based monitoring of the body and face, in two alert macaque monkeys. The  
69 animals performed a visual fixation task or visual discrimination task (Fig. 1). They fixated

70 a spot on the center of the display during stimulus presentation epochs, which allowed us  
 71 to reconstruct the stimulus in retinal coordinates. Outside of the stimulus-presentation  
 72 epochs, the animals freely moved their eyes. Like the mice in the previous studies<sup>19–21</sup>,  
 73 the monkeys were head-fixed, but otherwise free to move their arms, legs, and bodies  
 74 throughout and in between stimulus presentations while seated. As the videography  
 75 confirmed, the animals often fidgeted and moved spontaneously throughout the recording  
 76 sessions (Fig. 1B, Supplementary movie S1). To identify the animals' movement patterns  
 77 from the videos we used singular value decomposition (SVD), analogous to previous work  
 78 in mice<sup>19</sup> (Fig. 1B). From these data, we could directly ask to what extent the animals'  
 79 own spontaneous face and body movements predict neural activity in the primate visual  
 80 cortex.  
 81

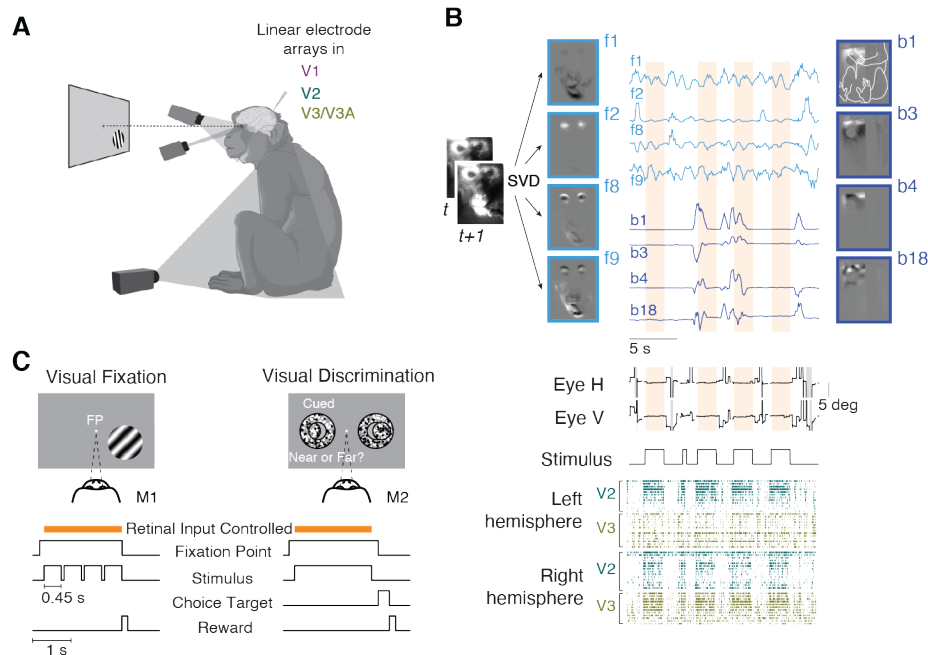

82  
 83 **Fig. 1 Monitoring spontaneous body movements during task performance in macaque**  
 84 **monkeys. (A)** The setup. The animals performed a visual task while extracellular activity in their  
 85 visual cortex was recorded and the animals' body, face, and eye movements were monitored via  
 86 video, with one camera directed at the body, one at the face, and a video-based eye tracker. **(B)**  
 87 Movements recorded by video (example from M2) were decomposed (singular value  
 88 decomposition, SVD) generating multiple components of face and body movement that map onto,  
 89 e.g., movements of the mouth (face component 1, f1), eye blinks (f2), combinations of face parts  
 90 (f8, f9), and combinations of hand, arm, leg and body movement (body components b1, b3, b4,  
 91 b18; outline of the monkey body shown in b1; grayscale shows normalized components; traces  
 92 show normalized temporal profiles of the video projected onto the components); middle panels  
 93 show eye positions and stimulus ON/OFF periods. Gray bands in eye position traces indicate  
 94 interrupted eye signals due to blinks or eccentric eye positions. Bottom: Sample spike-rasters of  
 95 simultaneously recorded units in the left and right hemisphere of V2 and V3/V3a. In each row  
 96 spike times from one unit are shown as vertical ticks. **(C)** Animal M1 performed a visual fixation  
 97 task. Animal M2 performed a visual discrimination task combined with block-wise manipulation of

98 spatial attention. The retinal input was controlled during periods (orange bar) when the animals  
99 fixated on a fixation point (FP) at the center of the screen.

100

101

## 102 **Spontaneous movements predict neural activity when the retinal input is** 103 **uncontrolled**

104 We analyzed the data using a linear encoding model<sup>20,21</sup>, to predict the neural activity  
105 using a set of “predictors” (Fig. **2A**). The predictors include controlled variables in the  
106 experiment related to the task and the stimulus, and uncontrolled but observable variables  
107 such as the temporal profiles of the movement components (Fig. **2A**, labels on left of the  
108 panel), as well as temporally shifted versions of these predictors. The model successfully  
109 captures the stimulus-aligned response: the predicted firing rate at 16ms resolution and  
110 the peristimulus spike density function (SDF) over all trials are closely matched (Fig. **2A**,  
111 right, **2C**). Such peristimulus SDF- based validation, however, obscures the effects of  
112 spontaneous movements on both the model and the data, because the movements are  
113 not necessarily time-locked to times in the trial. Indeed, while some movements were  
114 aligned with the trial events, there was substantial movement variability throughout the  
115 trial, including the stimulus presentation period, when the animals maintained visual  
116 fixation on a small dot in the center of the screen (Fig. **2B**). Thus, to capture trial-to-trial  
117 variability that included the potential role of the animal’s own body movements we  
118 evaluated model performance on an individual trial level (percent variance explained:  
119 %VE, see Methods), for each of the 900 units across both animals and all areas (Fig. **2D**).

120

121 To address our central question of whether neural activity can be explained by the  
122 animal’s spontaneous movements, we compared two models: first, the full model, with all  
123 the predictors (Fig. **2D**, full model; green), and second, a “task-only” model (Fig. **2D**,  
124 brown), which was the full model but with the contribution of the movement predictors  
125 removed (see Methods). The difference in variance explained between these two models  
126 – which is equivalent to the “unique variance”<sup>20</sup> of face/body movement components that  
127 we consider below – is a measure of the amount of variance that can be explained  
128 uniquely by knowing the animals’ own movements (Fig. **2D**, bottom). The results show  
129 that activity in the primate visual cortex was predictable from the animal’s own  
130 movements, although the size of this contribution in the macaques was smaller compared  
131 with that seen in mouse visual cortex<sup>20,21</sup>.

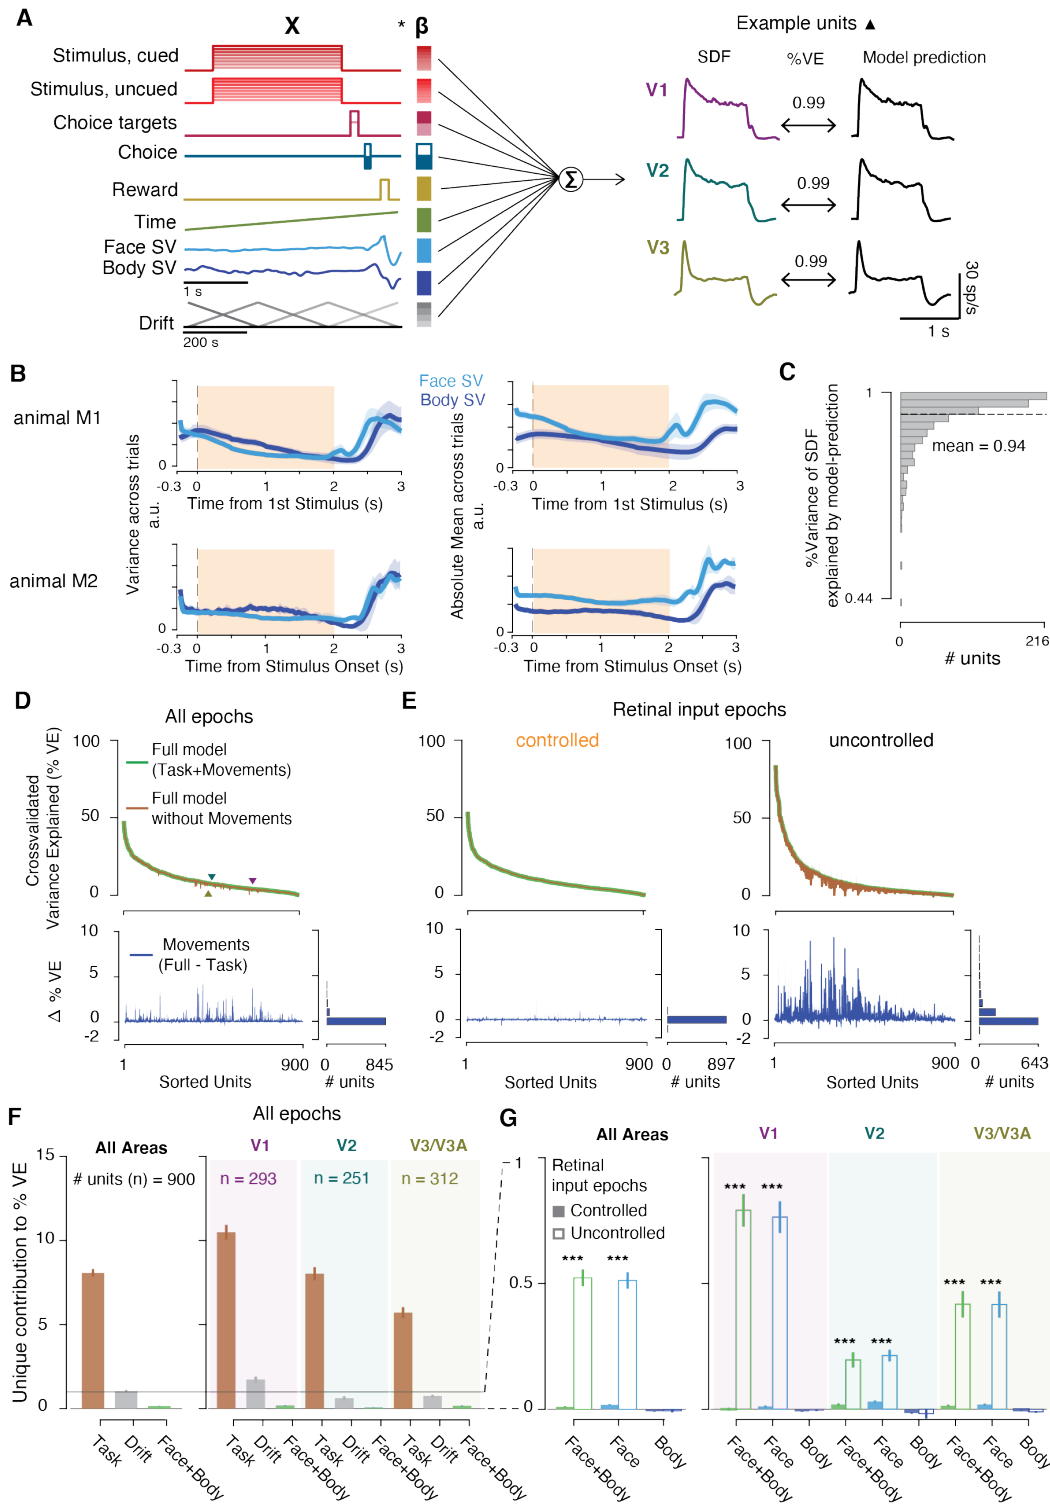

132  
133  
134  
135  
136  
137  
138

**Fig. 2 Body and face movement of the macaque monkey has minimal impact on neural activity in its visual cortex. (A)** Linear encoding model predicts neural firing in visual cortex (the predictors, labels left, are for the task used in M2. For M1, see Supplementary Fig. S2). The three traces show the peristimulus SDFs for sample units in V1, V2, and V3/V3A (left) and the model predictions (right). **(B)** Mean variance (left) and absolute mean (right) of the top 30 face and body movement components across trials (M1, top; M2, bottom). Shaded error bars, standard deviation

139 across sessions; shaded area: epochs during which the animals maintained visual fixation  
140 (controlled retinal input). **(C)** Histogram showing the distribution of cross validated variance  
141 explained (%VE, mean=94%, n=900 units from both animals) of the SDF by the model predictions  
142 across units. **(D)** Top: Variance explained across all timepoints by the model with (green), and  
143 without (brown) movement predictors for all units (%VE, mean = 9.8% and 9.67% respectively).  
144 Triangles show the example units from **(A)** (differences in %VE in **(A)** and **(D)** largely result from  
145 spike count variability at these high time resolutions). Bottom: Difference in variance explained by  
146 the two models, reflecting the %VE by movements. Units are ranked by their variance explained  
147 by the full model. **(E)** Same as **(D)**, but separately for epochs when retinal input was controlled  
148 (left, shaded interval in **B**), and not controlled (right). **(F)** Mean unique variance explained by  
149 different covariates towards the full model, for units across all areas (left; including 44 units for  
150 which the area could not be assigned) and separated by area (right). Error bars, standard error  
151 of mean across units. **(G)** Mean unique variance explained by movement covariates towards the  
152 full model, separately for controlled and uncontrolled retinal input epochs, for units across all  
153 areas (left), and separated by area (right). Note the smaller y-scale compared to **F**. Error bars,  
154 standard error of mean across units; \*\*\*,  $p < 0.001$ .

155  
156

157 To better understand how the monkeys' own movements could impact neural activity in  
158 the visual cortex, we examined the amount of unique variance during different epochs of  
159 the trial: when the retinal input was controlled because the animal maintained visual  
160 fixation (orange bar, Fig. **1C**), and when the retinal input was uncontrolled. In the first type  
161 of epoch, the retinal image (gray screen or the stimulus) is known, and the corresponding  
162 predictors can contribute systematically to the model predictions. In the second type of  
163 epoch the retinal image is not known and thus could drive activity in a way that is predicted  
164 by movements causing these changes in retinal input. For each unit, we applied a  
165 threshold to determine if the neural activity of the unit was associated with face or body  
166 movement (threshold: unique variance  $>0.1\%$ VE). Despite the fact that the animals  
167 moved spontaneously during both kinds of epochs (Fig. **2B**), the contribution of the model  
168 attributed to the movement almost completely disappeared when the retinal image could  
169 be inferred (Fig. **2E** left, 5% of units crossed the threshold; V1: 15/293, V2: 16/251,  
170 V3/V3A: 13/312), compared to when the retinal input was uncontrolled (Fig. **2E** right, 67%  
171 of units crossed the threshold, V1: 246/293, V2: 131/251, V3/V3A: 191/312). This result  
172 was robust for different thresholds of unique variance (table **S1**), and the increase in  
173 unique variance explained by movements when the retinal input was uncontrolled was  
174 significant ( $p < 0.001$  for each area and combined across areas, permutation test; Fig. **2G**;  
175 similar in each animal individually, Fig. **S3**). These results suggest that the larger unique  
176 contribution of the animal's own movements when the retinal image was uncontrolled was  
177 the result of changes in the retinal image associated with these movements.

178

## 179 **Retinal input control reduces activity predicted by spontaneous movements**

180 To validate this explanation, we compared the unique variance explained by movements  
181 inferred from the face view versus the body view. The explanation predicts that face  
182 movements, such as blinks or eye movements, are more likely than body movements to  
183 modulate neural activity. Consistent with this prediction, the increase in unique variance  
184 during epochs when the retinal input was uncontrolled was only significant for movements  
185 of the face ( $p < 0.001$  for each area and combined across areas, permutation test; Fig.  
186 **2G**). Moreover, removing the region of the eye from the face view reduced the increase  
187 in unique variance for retinal-input-uncontrolled epochs ( $p < 0.001$  for each area and  
188 combined across areas, permutation test). Conversely, the contribution by body  
189 movements was small throughout all epochs (Fig. **2G**, unique variance due to body  
190 covariates: mean across epochs and units = -0.005 %VE,  $p = 0.07$ ), mirroring previous  
191 findings in mice<sup>20</sup>.

192  
193 The data presented here suggest that accounting for retinal input removes the variability  
194 of neural responses that was predictable from the monkey's own movements. To further  
195 test this idea, we analyzed the time-points during which the retinal input was uncontrolled,  
196 i.e., when the animals could move their eyes freely. We classified these time-points into  
197 two subsets. The first subset are times when the retinal input to the receptive fields of the  
198 recorded neurons could be inferred from the eye position, i.e., when the receptive fields  
199 were on a blank gray screen. The second subset are times when the retinal input to the  
200 receptive fields could not be inferred, e.g., when the gaze of the animal took receptive  
201 fields off the screen, and they likely included visual structure from the room. If the absence  
202 of retinal image control can explain the apparent neural modulation by body/face  
203 components, then the neural modulation by the animal's movements should be higher in  
204 the latter case: when the retinal image is not known. This is exactly what we found  
205 (supplementary Fig. **S4**). Together, these results support a relationship between  
206 spontaneous movements in primates and visual cortical activity because of their  
207 correlation with changes in the retinal input.

208

## 209 **Attentional modulation is not associated with modulation by movements**

210 Modulation by locomotion in mice shows parallels to the modulation by spatial attention  
211 in primates<sup>25,26</sup>. To therefore test for a potential relationship between neural modulation  
212 by spontaneous movements and by attention, we trained one animal to perform a visual  
213 discrimination task while manipulating spatial attention and monitoring the animal's own  
214 movements. We observed the characteristic<sup>27</sup> increase in neural response when the  
215 animal's attention was directed to the receptive fields, including modest modulation by  
216 spatial attention in V1<sup>28</sup> (Fig. **3A**), but this attentional modulation was not correlated with  
217 spontaneous body movements (Fig. **3B**,  $p > 0.3$  for all areas; neural modulation by spatial

218 attention was also not correlated with the absolute value of the neural modulation by  
 219 face/body movements,  $p > 0.2$  for all areas). The analysis in Fig. **3B** is model free, and  
 220 shows that modulation by the animal's own movement was about an order of magnitude  
 221 smaller than the modulation by spatial attention (mean  $\pm$  standard deviation  $MI =$   
 222  $0.007 \pm 0.016$ ,  $0.009 \pm 0.03$ ,  $0.009 \pm 0.04$ ;  $AI = 0.05 \pm 0.05$ ,  $0.11 \pm 0.07$ ,  $0.11 \pm 0.09$  for V1, V2,  
 223 V3/V3A, respectively; the distributions for  $MI$  versus  $AI$  differed significantly in all areas,  
 224  $p = 0.003$ ,  $p = 10^{-36}$ ,  $p = 10^{-24}$ , for V1, V2, V3/V3A, respectively, t-tests, corrected for multiple  
 225 comparisons). These findings corroborate our model-based results and provide evidence  
 226 against an association in macaques between a modulation by an animal's own  
 227 movements and the modulation by spatial attention.  
 228

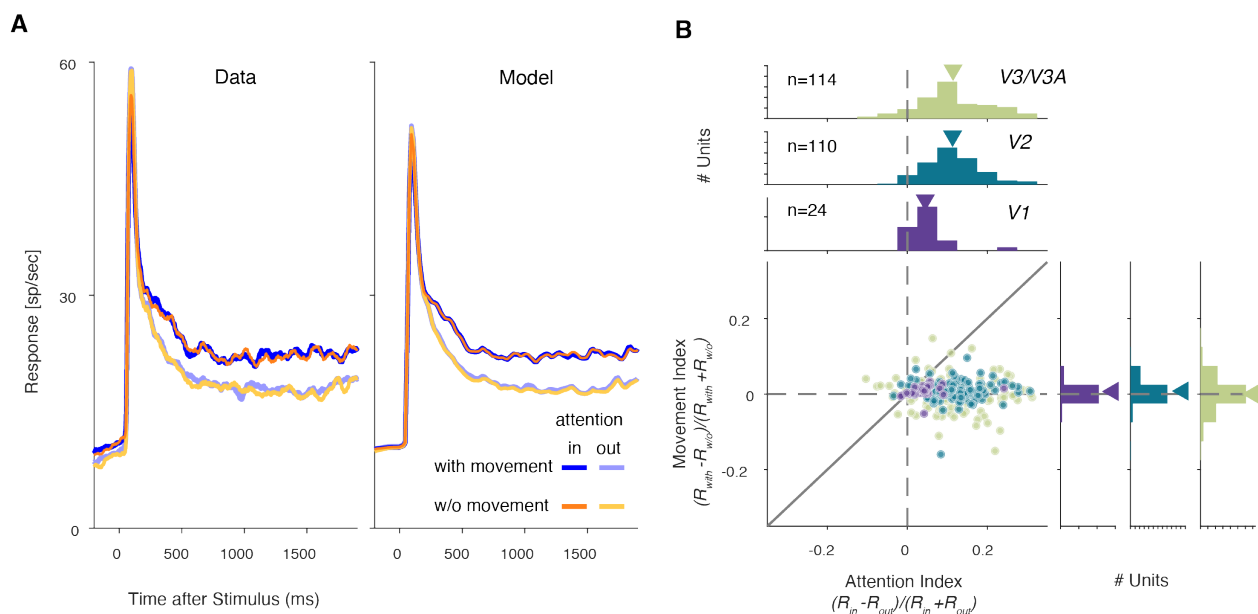

229  
 230 **Fig 3 Modulation by spatial attention is not associated with modulation by movement. (A)**  
 231 Average stimulus-driven responses across all units ( $n = 248$ , left; peristimulus SDF; right: rates  
 232 predicted by the full model) separated by attention and the presence or absence of the animals'  
 233 spontaneous movements. **(B)** Modulation indices for attention ( $AI$ ) are not correlated with those  
 234 for movement ( $MI$ ) in V1, V2 and V3/V3A.  
 235

## 236 237 Discussion

238 The present results show that in macaque monkeys, spontaneous body and face  
 239 movements accounted for very little of the variability of single-trial neural dynamics in  
 240 macaque V1, V2 and V3/V3A. This contrasts with results in mice, where substantial  
 241 modulation of visual cortical activity is associated with the animal's own spontaneous  
 242 movements<sup>19–21</sup>. The difference in results across species cannot be attributed to a  
 243 difference in analysis methods: the present analysis was designed to replicate the  
 244 approach used in mice (see Methods), and, when retinal input in the macaque monkeys



245 was uncontrolled, spontaneous movements did account for appreciable neural variability,  
246 as in mice. Moreover, the neural measurements used presently recovered the expected  
247 modest levels of neural modulation caused by spatial attention<sup>27,28</sup>, even in V1, implying  
248 sufficient sensitivity of the neural recordings, and the present results parallel recent  
249 observations in marmosets of a quantitative difference in the neural modulation in visual  
250 cortex with locomotion between primates and rodents<sup>29</sup>.

251 Our results are also consistent with previously observed modulations by eye-movements,  
252 including microsaccades<sup>30–37</sup>, or gaze position<sup>38</sup> but reveal that these are small (Fig. 2,  
253 Fig. S4) compared to the overall response variability in the macaque visual cortex, in line  
254 with early reports<sup>39,40</sup>. The results here, combined with the findings in marmosets<sup>29</sup>,  
255 therefore suggest that decades of neurophysiological research on the primate visual  
256 system need not be revisited in light of the pronounced modulations by spontaneous  
257 movements observed in mice.

258 While the results here raise the possibility that some fraction of the neural modulation  
259 associated with movement observed in mice is related to uncontrolled retinal input, there  
260 are good reasons to suspect genuine differences in the mechanisms of embodiment  
261 between mice and monkeys. Primates and rodents differ not only in body anatomy, but  
262 also in behavior and brain organization. Primary visual cortex in mouse receives  
263 substantial direct projections from premotor areas<sup>41</sup> but does not in monkey<sup>42</sup>, and the  
264 neuromodulatory system in visual cortex also differs in the two species<sup>43</sup>. A direct  
265 modulation of visual cortical responses by movement may be evident in higher visual  
266 areas in primates, which are perhaps a closer analogue of primary visual cortex in  
267 rodents<sup>44–46</sup>. The difference in results between mice and primates may therefore reflect  
268 corresponding differences in anatomy and behavior<sup>47</sup>. Primates must make sense of the  
269 statistics of their visual input and how that input is shaped not only by their body's own  
270 locomotion<sup>48</sup> but also prominently by their eye movements<sup>49–51</sup>. These demands may  
271 have selected mechanisms to emphasize embodiment that exploit input provided by the  
272 eyes themselves.

## 273 References:

- 274 1. Hein, A., Held, R. & Gower, E. C. Development and segmentation of visually controlled movement by  
275 selective exposure during rearing. *J. Comp. Physiol. Psychol.* **73**, 181–187 (1970).
- 276 2. Brooks, R. A. Elephants don't play chess. *Robot. Auton. Syst.* **6**, 3–15 (1990).
- 277 3. Duan, J., Yu, S., Tan, H. L., Zhu, H. & Tan, C. A Survey of Embodied AI: From Simulators to  
278 Research Tasks. *IEEE Trans. Emerg. Top. Comput. Intell.* **6**, 230–244 (2022).
- 279 4. Gibson, J. J. *The senses considered as perceptual systems*. vol. 2 (Houghton Mifflin Boston, 1966).
- 280 5. Gibson, J. J. A theory of direct visual perception. in *Vision and Mind: Selected Readings in the*  
281 *Philosophy of Perception* (eds. Noe, A. & Thompson, E.) 77–89 (MIT Press, 1972).
- 282 6. Sommer, M. A. & Wurtz, R. H. Brain Circuits for the Internal Monitoring of Movements. *Annu. Rev.*  
283 *Neurosci.* **31**, 317–338 (2008).
- 284 7. Niell, C. M. & Stryker, M. P. Modulation of visual responses by behavioral state in mouse visual  
285 cortex. *Neuron* **65**, 472–479 (2010).
- 286 8. Keller, G. B., Bonhoeffer, T. & Hübener, M. Sensorimotor Mismatch Signals in Primary Visual Cortex  
287 of the Behaving Mouse. *Neuron* **74**, 809–815 (2012).
- 288 9. Ayaz, A., Saleem, A. B., Schölvinc, M. L. & Carandini, M. Locomotion Controls Spatial Integration in  
289 Mouse Visual Cortex. *Curr. Biol.* **23**, 890–894 (2013).
- 290 10. Bennett, C., Arroyo, S. & Hestrin, S. Subthreshold Mechanisms Underlying State-Dependent  
291 Modulation of Visual Responses. *Neuron* **80**, 350–357 (2013).
- 292 11. Polack, P.-O., Friedman, J. & Golshani, P. Cellular mechanisms of brain state-dependent gain  
293 modulation in visual cortex. *Nat. Neurosci.* **16**, 1331–1339 (2013).
- 294 12. Saleem, A. B., Ayaz, A., Jeffery, K., Harris, K. D. & Carandini, M. Integration of visual motion and  
295 locomotion in mouse visual cortex. *Nat. Neurosci.* **16**, 1864–1869 (2013).
- 296 13. Erisken, S. *et al.* Effects of Locomotion Extend throughout the Mouse Early Visual System. *Curr. Biol.*  
297 **24**, 2899–2907 (2014).
- 298 14. Fu, Y. *et al.* A Cortical Circuit for Gain Control by Behavioral State. *Cell* **156**, 1139–1152 (2014).
- 299 15. Reimer, J. *et al.* Pupil fluctuations track rapid changes in adrenergic and cholinergic activity in cortex.  
300 *Nat. Commun.* **7**, 13289 (2016).
- 301 16. Vinck, M., Batista-Brito, R., Knoblich, U. & Cardin, J. A. Arousal and Locomotion Make Distinct  
302 Contributions to Cortical Activity Patterns and Visual Encoding. *Neuron* **86**, 740–754 (2015).
- 303 17. Mineault, P. J., Tring, E., Trachtenberg, J. T. & Ringach, D. L. Enhanced Spatial Resolution During  
304 Locomotion and Heightened Attention in Mouse Primary Visual Cortex. *J. Neurosci.* **36**, 6382–6392  
305 (2016).
- 306 18. Pakan, J. M. *et al.* Behavioral-state modulation of inhibition is context-dependent and cell type  
307 specific in mouse visual cortex. *eLife* **5**, e14985 (2016).
- 308 19. Stringer, C. *et al.* Spontaneous behaviors drive multidimensional, brainwide activity. *Science* **364**,  
309 eaav7893 (2019).
- 310 20. Musall, S., Kaufman, M. T., Juavinett, A. L., Gluf, S. & Churchland, A. K. Single-trial neural dynamics  
311 are dominated by richly varied movements. *Nat. Neurosci.* **22**, 1677–1686 (2019).
- 312 21. Salkoff, D. B., Zagha, E., McCarthy, E. & McCormick, D. A. Movement and Performance Explain  
313 Widespread Cortical Activity in a Visual Detection Task. *Cereb. Cortex* **30**, 421–437 (2020).
- 314 22. Drew, P. J., Winder, A. T. & Zhang, Q. Twitches, Blinks, and Fidgets: Important Generators of  
315 Ongoing Neural Activity. *The Neuroscientist* **25**, 298–313 (2019).
- 316 23. Parker, P. R. L., Brown, M. A., Smear, M. C. & Niell, C. M. Movement-Related Signals in Sensory  
317 Areas: Roles in Natural Behavior. *Trends Neurosci.* **43**, 581–595 (2020).
- 318 24. Zagha, E. *et al.* The Importance of Accounting for Movement When Relating Neuronal Activity to  
319 Sensory and Cognitive Processes. *J. Neurosci.* **42**, 1375–1382 (2022).
- 320 25. Harris, K. D. & Thiele, A. Cortical state and attention. *Nat. Rev. Neurosci.* **12**, 509–523 (2011).
- 321 26. Maimon, G. Modulation of visual physiology by behavioral state in monkeys, mice, and flies. *Curr.*  
322 *Opin. Neurobiol.* **21**, 559–564 (2011).
- 323 27. Maunsell, J. H. R. Neuronal Mechanisms of Visual Attention. *Annu. Rev. Vis. Sci.* **1**, 373–391 (2015).
- 324 28. McAdams, C. J. & Reid, R. C. Attention Modulates the Responses of Simple Cells in Monkey Primary  
325 Visual Cortex. *J. Neurosci.* **25**, 11023–11033 (2005).

- 326 29. Liska, J. P. *et al.* Running modulates primate and rodent visual cortex via common mechanism but  
327 quantitatively distinct implementation. Preprint at <https://doi.org/10.1101/2022.06.13.495712> (2022).
- 328 30. Gur, M., Beylin, A. & Snodderly, D. M. Response Variability of Neurons in Primary Visual Cortex (V1)  
329 of Alert Monkeys. *J. Neurosci.* **17**, 2914–2920 (1997).
- 330 31. Leopold, D. A. & Logothetis, N. K. Microsaccades differentially modulate neural activity in the striate  
331 and extrastriate visual cortex. *Exp. Brain Res.* **123**, 341–345 (1998).
- 332 32. Snodderly, D. M., Kagan, I. & Gur, M. Selective activation of visual cortex neurons by fixational eye  
333 movements: Implications for neural coding. *Vis. Neurosci.* **18**, 259–277 (2001).
- 334 33. Nakamura, K. & Colby, C. L. Updating of the visual representation in monkey striate and extrastriate  
335 cortex during saccades. *Proc. Natl. Acad. Sci.* **99**, 4026–4031 (2002).
- 336 34. Hass, C. A. & Horwitz, G. D. Effects of microsaccades on contrast detection and V1 responses in  
337 macaques. *J. Vis.* **11**, 3 (2011).
- 338 35. McFarland, J. M., Bondy, A. G., Saunders, R. C., Cumming, B. G. & Butts, D. A. Saccadic modulation  
339 of stimulus processing in primary visual cortex. *Nat. Commun.* **6**, 8110 (2015).
- 340 36. Supèr, H., van der Togt, C., Spekreijse, H. & Lamme, V. A. F. Correspondence of presaccadic  
341 activity in the monkey primary visual cortex with saccadic eye movements. *Proc. Natl. Acad. Sci.* **101**,  
342 3230–3235 (2004).
- 343 37. Martinez-Conde, S., Macknik, S. L. & Hubel, D. H. Microsaccadic eye movements and firing of single  
344 cells in the striate cortex of macaque monkeys. *Nat. Neurosci.* **3**, 251–258 (2000).
- 345 38. Morris, A. P. & Krekelberg, B. A Stable Visual World in Primate Primary Visual Cortex. *Curr. Biol.* **29**,  
346 1471-1480.e6 (2019).
- 347 39. Wurtz, R. H. Comparison of effects of eye movements and stimulus movements on striate cortex  
348 neurons of the monkey. *J. Neurophysiol.* **32**, 987–994 (1969).
- 349 40. Wurtz, R. H. Response of striate cortex neurons to stimuli during rapid eye movements in the  
350 monkey. *J. Neurophysiol.* **32**, 975–986 (1969).
- 351 41. Markov, N. T. *et al.* A Weighted and Directed Interareal Connectivity Matrix for Macaque Cerebral  
352 Cortex. *Cereb. Cortex* **24**, 17–36 (2014).
- 353 42. Leinweber, M., Ward, D. R., Sobczak, J. M., Attinger, A. & Keller, G. B. A Sensorimotor Circuit in  
354 Mouse Cortex for Visual Flow Predictions. *Neuron* **95**, 1420-1432.e5 (2017).
- 355 43. Coppola, J. J. & Disney, A. A. Is There a Canonical Cortical Circuit for the Cholinergic System?  
356 Anatomical Differences Across Common Model Systems. *Front. Neural Circuits* **12**, (2018).
- 357 44. Garrett, M. E., Nauhaus, I., Marshel, J. H. & Callaway, E. M. Topography and Areal Organization of  
358 Mouse Visual Cortex. *J. Neurosci.* **34**, 12587–12600 (2014).
- 359 45. Froudarakis, E. *et al.* The Visual Cortex in Context. *Annu. Rev. Vis. Sci.* **5**, 317–339 (2019).
- 360 46. de Vries, S. E. J. *et al.* A large-scale standardized physiological survey reveals functional  
361 organization of the mouse visual cortex. *Nat. Neurosci.* **23**, 138–151 (2020).
- 362 47. Miller, C. T. *et al.* Natural behavior is the language of the brain. *Curr. Biol.* **32**, R482–R493 (2022).
- 363 48. Matthis, J. S., Muller, K. S., Bonnen, K. L. & Hayhoe, M. M. Retinal optic flow during natural  
364 locomotion. *PLOS Comput. Biol.* **18**, e1009575 (2022).
- 365 49. Yarbus, A. L. *Eye Movements and Vision*. (Springer, 1967).
- 366 50. Gibaldi, A. & Banks, M. S. Binocular Eye Movements Are Adapted to the Natural Environment. *J.*  
367 *Neurosci.* **39**, 2877–2888 (2019).
- 368 51. Samonds, J. M., Geisler, W. S. & Priebe, N. J. Natural image and receptive field statistics predict  
369 saccade sizes. *Nat. Neurosci.* **21**, 1591–1599 (2018).
- 370

371 **Acknowledgments:**

372 We would like to thank the members of the laboratory of sensorimotor research for their  
373 insightful comments, Richard Krauzlis and Bevil Conway for discussions and comments  
374 on an earlier version of this manuscript and Florian Dehmelt, Paria Pourriahi and Lenka  
375 Seillier for early technical support.

376 **Funding:**

377 National Eye Institute Intramural Research Program at the National Institutes of Health  
378 1ZIAEY000570-01 (HN)

379 German Research Foundation (DFG), 276693517 (TP6) (HN)

380 National Science Foundation, IIS1350990 (DAB)

381 **Author contributions:**

382 Conceptualization: JY, HN

383 Methodology: BCT, IK, JY, DAB, HN

384 Investigation: IK, KRQ

385 Data analysis: BCT, IK, AL, JY, HN

386 Video labeling: NK

387 Visualization: BCT, IK, HN

388 Funding acquisition: HN

389 Project administration: HN

390 Supervision: JY, DAB, HN

391 Writing – original draft: BCT, IK, HN

392 Writing – review & editing: BCT, IK, JY, DAB, HN

393 **Competing interests:**

394 Authors declare that they have no competing interests.

## 395 Supplementary Information

396

### 397 **Materials and Methods**

#### 398 *Animals*

399 Two adult male rhesus monkeys (*Macaca mulatta*) were used as subjects (animal 1 (M1);  
400 animal 2 (M2); each 9 kg). All protocols were approved by the National Eye Institute  
401 Animal Care and Use Committee (M1) or by the relevant local authority (M2), the  
402 Regierungspräsidium Tübingen, Germany, and all experimental procedures were  
403 performed in compliance with the US Public Health Service Policy on humane care and  
404 use of laboratory animals. Under general anesthesia, the monkeys were surgically  
405 implanted with a titanium head post, and in a subsequent procedure with a recording  
406 chamber (19 mm inner diameter, cilux, Crist Instrument, Hagerstown, MD) over right  
407 hemispheric V1 (M1), and with two titanium recording chambers (25mm inner diameter)  
408 over the operculum of V1 on both hemispheres (M2), guided by structural MRI scans of  
409 the brain.

#### 410 *Behavioral tasks*

411 *Visual Fixation:* Animal M1 was required to fixate on a small spot (Fixation Point (FP),  
412 0.3° diameter) at the center of the screen for about 2sec to receive a liquid reward, while  
413 a drifting sinusoidal luminance grating was flashed four times (450 ms duration each  
414 separated by an interval of approximately 50ms of a blank screen) over the receptive  
415 fields (RFs) of the recorded units (left panel of Fig. **1B**). In addition to visual fixation,  
416 animal M2 also performed a visual discrimination task.

417 *Disparity Discrimination:* Animal M2 performed a disparity discrimination task (right panel  
418 of Fig. 1B) previously described in detail<sup>52</sup>. Briefly, once the animal fixated on a FP (0.1°  
419 diameter), two circular dynamic random-dot stereograms (RDSs, for details see *Visual*  
420 *Stimuli*), consisting of a disparity-varying center surrounded by an annulus fixed at zero  
421 disparity, were presented, one in each visual hemifield. Stimuli presented in one hemifield  
422 were task-relevant. The animal had to judge whether the center disparity of the relevant  
423 RDS was protruding ('near'; negative disparity) or receding ('far'; positive disparity)  
424 relative to a surrounding annulus. After two seconds, the FP and the RDSs were replaced  
425 with two choice icons (circular RDSs at 100% disparity signal, one at the near, the other  
426 at the far signal disparity) positioned above and below the FP but horizontally offset  
427 towards the cued side. The animal was rewarded after making a saccade within 2sec  
428 after the onset of the choice icons, to the choice icon that had the same sign of the  
429 disparity signal as the stimulus. The task-relevant hemifield was cued by three instruction  
430 trials at the beginning of each 50-trial block. On instruction trials a single stimulus was  
431 presented on the task-relevant side. The vertical position (~3° above or below the fixation

432 point) of the choice icons was randomized across trials to prevent a fixed mapping  
433 between the chosen disparity sign and saccade direction.

#### 434 *Visual Stimuli*

435 Visual stimuli were back-projected on a screen (Stewart Filmscreen, Torrance, CA) by a  
436 DLP LED projector (Propixx, VPixx Technologies, Saint-Bruno, QC, Canada; 1920×1080-  
437 pixel resolution). The display was achromatic, and the luminance steps were linearized  
438 (mean luminance: 72 cd/m<sup>2</sup> for M1, 30 cd/m<sup>2</sup> for M2). Visual stimuli were presented on a  
439 uniform display at the mean luminance. Separate images were delivered to the two eyes  
440 (120 Hz for M1 and 60 Hz for M2, for each eye) using a combination of an active circular  
441 polarizer (DepthQ, Lightspeed Design Inc., Bellevue, WA) in front of the projector and two  
442 passive circular polarizers with opposite polarities (American Polarizers, Reading, PA) in  
443 front of the eyes. The viewing distance was 45 cm for M1 and 97.5 cm for M2, at which  
444 the display subtended 74° by 42° for M1 and 32° by 18° for M2.

445 Stimuli used in the fixation task for M1 were drifting circular sinusoidal luminance gratings  
446 whose position and size were tailored to the collective RFs of the recording site. The  
447 spatial frequency was adjusted inversely proportional to the RF size and the temporal  
448 frequency was typically 4 or 5 Hz. The contrast of the stimulus during each of four 450-  
449 ms stimulus epochs on a trial was randomly chosen from 4 values (0, i.e., blank stimulus,  
450 6.25, 25, and 100%) with equal probabilities.

451 Stimuli used in the disparity discrimination task for M2 were circular dynamic RDSs (50%  
452 black, 50% white dots, dot size typically 0.08° radius, 50% dot density) with a disparity  
453 varying central disk (3-5° in diameter, approximately matching the RF size of the recorded  
454 units) surrounded by an annulus of zero disparity (1° width). The positions of the dots  
455 were updated on each frame. The central disk consisted of signal frames randomly  
456 interleaved with noise frames. For each session, the signal disparities (one near disparity,  
457 one far disparity) were fixed. The center disparity of the stimulus was updated on each  
458 video-frame. On “signal frames”, the center disparity was one of the signal disparities,  
459 held constant across each trial. On a “noise frame”, the disparity of the center disk was  
460 randomly chosen from a uniform distribution of 9 values equally spaced from -0.4° to 0.4°.  
461 The task difficulty on a trial was defined as the ratio of the signal to noise frames such  
462 that 100% means that all frames were signal frames, and 0% means all frames were  
463 drawn from the noise distribution. On a 0% trial, the reward was randomly given 50% of  
464 times. The choice target icons were also circular RDSs but slightly smaller than the  
465 stimuli, and always presented at 100% near and far signal. We assessed disparity tuning  
466 before the behavioral task in separate visual fixation experiments using RDSs (450 ms  
467 duration), whose disparity varied typically from -1° to 1° in 0.1° increments. The two signal

468 disparities in each session were chosen to approximately match the preferred and non-  
469 preferred disparities by most of the recorded units.

470 Receptive fields (Supplementary Fig. **S1**) of the recorded units were first approximated  
471 by a bar stimulus whose orientation and position were manually controlled, then  
472 quantitatively measured with strips of horizontal or vertical bars (450 ms duration each,  
473 typically white and black bars but sometimes RDSs at the preferred disparity when they  
474 evoked stronger responses) that were equally spaced over the range covering RFs  
475 estimated by manual sweeping (typically 9 to 11 positions whose intervals were  
476 determined by the collective RF range).

477 Visual stimuli were generated in MATLAB (MathWorks, Natick, MA) by custom-written  
478 code<sup>53</sup>, adapted from Eastman & Huk<sup>54</sup> using the Psychophysics toolbox<sup>55</sup>.

#### 479 *Electrophysiological Recordings*

480 Extracellular recordings were made from areas V1, V2 and V3/V3A using multi-channel  
481 laminar probes (Plexon Inc., Dallas, TX; V/S Probes, 24/32 channels, 50 to 100  $\mu$ m inter-  
482 contact spacing). Neuronal signals were amplified, filtered (250 Hz to 5 kHz) and digitized  
483 (30 kHz sampling rate) by the Grapevine Neural Interface Processor (NIP, Ripple Neuro,  
484 Salt Lake City, UT) run by the Trellis software (Ripple Neuro, Salt Lake City, UT) that  
485 interfaced with MATLAB via Xippmex (v1.2.1; Ripple Neuro, Salt Lake City, UT).

486 We inserted recording probes on each day of experiments via the operculum of V1 using  
487 a custom-made (M1) or customized (M2; NaN Instruments, Israel) micro-drive placed  
488 approximately normal to the surface. We initially mapped the recording sites using single  
489 tungsten-in-glass electrodes (Alpha Omega, Nazareth, Israel) to determine the receptive  
490 field locations and assess the selectivity for horizontal disparity. During data collection,  
491 visual areas were identified using two physiological criteria: 1) transitions from a gray to  
492 white matter, which was typically characterized by a silent zone that spanned a few  
493 consecutive channels showing weak or no visually driven responses, 2) abrupt shifts in  
494 the receptive field location and size, and often abrupt changes in the tuning preferences  
495 for orientation or disparity. Final assignments of channels to visual areas were done  
496 offline with the aid of receptive field maps constructed from receptive field location and  
497 size determined from quantitative fitting (see below) across all sessions (see  
498 supplementary Fig. **S1**), combined with the structural MRI scans. Because of the  
499 similarity between the disparity selectivity in V3 and V3A<sup>56</sup>, we did not seek to further  
500 assign channels to V3 or V3A, and instead designate them collectively as V3/V3A.

501 On each day of experiments, after the laminar probe was advanced to a depth at which  
502 most channels spanned the visual area we intended to record from, we usually advanced  
503 it further down to confirm the visual area underneath. Then, we withdrew the probe back

504 to the desired depth and waited for at least 30 min before data collection to allow time for  
505 the tissue around the probe to be stabilized, thereby to minimize vertical drifts of the  
506 recording site along the probe. We mapped the receptive fields before, sometimes in  
507 between, and after data collection to diagnose drifts of the neural tissue relative to the  
508 electrode via the receptive field position across the channels during data collection. We  
509 only included units that remained in the same visual areas during the entire data collection  
510 period and excluded units whose activity was picked up by channels positioned within the  
511 transition depth between visual areas at any time during data collection.

### 512 *Measurements of eye position*

513 We monitored the animals' binocular eye positions using the EyeLink 1000 infrared video  
514 tracking system (SR Research, Ottawa, ON, Canada) at a sampling frequency of 500 Hz.

### 515 *Recording of face and body movements*

516 To record the face and body movements of the animals during data collection, we installed  
517 infrared (940nm) LEDs and at least two cameras (Fig. **1A**; M1 – Stingray camera  
518 integrated in a CinePlex Behavioral Research System, Plexon Inc., Dallas, TX, 60 or 80  
519 Hz sampling rate, downsampled to 20Hz and spatially downsampled by 2x2 pixels for  
520 analysis; M2 – Imaging Source DMK camera; triggered image acquisition at 12.5 Hz),  
521 one pointing to the face, and one to the front view of the body.

522

### 523 *Data Analysis*

#### 524 *Spike sorting*

525 We sorted spikes from single- or multi-units offline using Kilosort2.5<sup>57</sup> followed by manual  
526 curation in Python ([www.github.com/cortex-lab/phy](http://www.github.com/cortex-lab/phy)) for data from M1, and using the  
527 Plexon Offline Sorter (v3.3.5; Plexon Inc., Dallas, TX) for data from M2. We analyzed  
528 spikes from both single- and multi-units isolated by the spike sorting procedures, which  
529 we refer to as units without distinction.

#### 530 *Receptive fields*

531 To measure receptive fields, we averaged the multi-unit response (spike count during  
532 stimulus interval) on each recording channel for each position of the bar stimuli. We fit a  
533 Gabor function to the mean response as a function of stimulus position, separately for the  
534 horizontal and vertical dimensions, using MATLAB (*Isqnonlin*). The center of the receptive  
535 field was defined as the position at the peak of the fitted function, and the width as the  
536 distance between the two positions flanking the peak at which the fitted function reached  
537 20% of its peak above the offset (Fig. **S1**).



538 *Motion decomposition*

539 To quantify the face and body movements, we selected regions of interest (ROI) from the  
540 videos with the face view and the frontal body view to include only the animal's face and  
541 body. The movements in the selected ROIs were decomposed into movement  
542 components using singular value decomposition (SVD) following the method in Stringer  
543 at al.<sup>19</sup> ([www.github.com/MouseLand/FaceMap](https://www.github.com/MouseLand/FaceMap)), via temporal-segment wise SDV (~1  
544 min long segments of the videos) (Fig. **1C**). The motion matrix  $M$  of the video, where  $M$   
545 is the absolute pixel-wise difference between two consecutive frames (number of the  
546 pixels in the ROI  $\times$  number of the video frames minus 1), was then projected onto the first  
547 1000 movement components to calculate their temporal profiles. These temporal profiles  
548 correspond to the face/body movement regressors used in the ridge regression modeling  
549 approach described below. To evaluate the contribution of the movement components of  
550 the eye region in the face view to neural modulation (see Results), we performed the  
551 same SVD analysis on the face videos after the eye regions were removed from the face  
552 ROI.

553 *Modeling neural activity during trials*

554 We modeled the spiking activity of each unit as a linear combination of task-related and  
555 task-unrelated events within a session using ridge regression adapted after Musall,  
556 Kaufmann et al.<sup>20</sup>. Our linear multivariate regression is thus analogous to the approach  
557 used previously in mice<sup>20,21</sup>. Although a non-linear model might achieve better overall  
558 predictions, we used a linear statistical model to facilitate this comparison to mice, such  
559 that it cannot account for the discrepancy between the previous findings in mice and our  
560 findings in the macaque visual cortex.

561  
562 Regressors for task-related events reflect the stimulus, the time since the beginning of  
563 the trial, the timing of reward in both animals, and additionally, the presence of choice-  
564 targets and saccadic choice in animal M2 (Fig. **2A**). Regressors for task-unrelated events  
565 were based on face and body movements, and a slow drift term to capture non-  
566 stationarities in firing rates of each unit. Below we describe the individual regressors:

567  
568 *Stimulus regressors:* stimulus regressors were discrete binary vectors with one dimension  
569 for each distinct stimulus (i.e., disparity and contrast). They had the value 1 for the  
570 appropriate stimulus dimension in the time periods spanning the stimulus presentation  
571 window and 0 elsewhere. Separate regressors were used to model different stimulus  
572 values. In addition, in animal M1, within each stimulus value (i.e., the four contrast values),  
573 separate regressors were used for the 4 successive samples in time (supplementary fig.  
574 **S2**). In animal M2, within each stimulus value (i.e., the disparity value on each video-  
575 frame), separate regressors were used for stimulus presentations on the left and right

576 hemifields (i.e., whether the attended stimulus was within or outside of the receptive field  
577 of the recorded neuron). This allowed us to capture modulation of spiking activity as a  
578 function of sample position within the stimulus sequence and stimulus contrast in animal  
579 M1, and as a function of disparity and attended location in animal M2.

580 *Reward regressors*: reward regressors were discrete binary vectors with value 1 at reward  
581 onset and 0 elsewhere.

582 *Time regressors*: time regressors were discrete binary vectors with value 1 at stimulus  
583 onset and 0 elsewhere and were used to model modulations in spiking activity due to  
584 stimulus onset and offsets (see fitting procedure).

585 *Choice-target, and Choice-saccade regressors*: animal M2 performed a discrimination  
586 task requiring him to make a saccade to one of the two targets presented after the  
587 stimulus offset. Target regressors were discrete binary vectors with value 1 at target  
588 presentation and 0 elsewhere. Separate regressors were used to model targets  
589 presented offset to the left and right hemifields. Choice regressors were discrete  
590 regressors with the value +/- 1 to model saccades to the top and bottom target when the  
591 animal reported the choice and 0 elsewhere.

592 *Drift regressors*: non-stationarity in firing rates for each unit was modeled as a set of  
593 analog regressors using tent basis functions spanning the entire session<sup>52</sup>. These basis  
594 functions allow for a smoothly varying drift term that can be fitted as linear model terms.  
595 We defined anchor points placed at regular intervals within each session (10 and 8 anchor  
596 points for animals M1 and M2, respectively), each denoting the center of each basis  
597 function. The basis function has a value 1 at the corresponding anchor point, and linearly  
598 decreases to 0 at the next, and previous anchor point, and remains 0 elsewhere. Thus,  
599 any offset at each timepoint due to slow drift in firing rate is modeled by a linear  
600 combination of the two basis functions. While the drift regressors were included to  
601 account for non-stationarities related to experimental factors, they would also capture  
602 factors related to slowly changing cognitive states throughout a session<sup>58</sup>. To therefore  
603 avoid that the drift predictors accounted for the block-wise alternation in spatial attention  
604 for M2, we ensured that no more than one anchor point was used for each pair of  
605 successive, i.e., alternating, blocks of attention.

606 *Face & Body movement regressors*: the temporal profiles of the top 30 SVD components  
607 (SVs) of videos capturing movements in the face and body regions in both animals were  
608 used as analog regressors to model modulation in spiking activity due to movements.  
609 Note that since we did not additionally include regressors for pupil-size or eye-position,  
610 this gives the included movement regressors the possibility to also explain neuronal  
611 variability that might otherwise be explained by pupil regressors due to the correlation  
612 between these covariates<sup>16</sup>. To avoid overfitting, we limited our analysis to 30SVs, but  
613 our results were qualitatively similar when the top 200 SVs were used instead  
614 (supplementary fig. **S5**).

615

### 616 *Fitting procedure*

617 Recordings from each session were first split into individual trials. We modeled only  
618 successfully completed trials. Each trial was defined by a 300ms pre-stimulus period, the  
619 stimulus presentation window, and a 1000ms window after stimulus offset. This allowed  
620 us to split time-periods within an individual trial into those where the retinal input was  
621 controlled, i.e., the animal maintained visual fixation, and where the retinal input was  
622 uncontrolled. Time points within each session were discretized into non-overlapping  
623 16.67ms wide time bins, matching the lower framerate of the stimulus displays used for  
624 the two monkeys. Spiking activity of each unit was quantified as the number of spikes in  
625 each time-bin, and all the regressors were down-sampled to 60 Hz while preserving their  
626 discrete/analog nature. On trials where the 1s post-stimulus window of the current trial  
627 overlapped with the 0.3s pre-stimulus window of the next trial, we reduced the post-  
628 stimulus window to only include the non-overlapping time bins.

629 Because the effect on neural activity of a given regressor will often play out across time,  
630 we modeled the effect of each regressor using a time-varying "event kernel" by creating  
631 numerous copies of individual regressors each shifted in time by one frame<sup>20</sup> relative to  
632 the original using pre-defined time windows. These time-windows for stimulus, reward,  
633 and choice-target regressors were 250ms post-event, for choice-saccade regressors  
634 were 500ms pre- and post- event, and for time regressors spanned the entire duration of  
635 the trial following the stimulus onset including the post-stimulus window. The time-varying  
636 kernels of the analog movement regressors were modeled by convolving the temporal  
637 profiles of the corresponding component with separate tent basis functions with anchor  
638 points at -100ms, 0ms, and 100ms with respect to the movement event. This allowed us  
639 to capture the temporal dependence of spiking activity on the movement within a 400ms  
640 time window, resulting in a total of 90 regressors each for face and body movement  
641 components. All the event kernels were constructed at the level of individual trials.

642 We fit the models using ridge regression and 10-fold cross-validation across trials to avoid  
643 overfitting. Trials were randomly assigned to training or test dataset within each fold such  
644 that no event kernel spanned samples from both the training and test sets. Separate ridge  
645 penalty parameters were estimated for each unit during the first cross-validation fold  
646 which were then used in subsequent folds.

647

### 648 *Model performance*

649 We used cross-validated variance explained (%VE) as the measure of model  
650 performance. This is computed based on the variance of the residual of the model  
651 prediction (prediction minus the binned spike count) compared with the overall variance  
652 of the observed binned data. Note that %VE at the single-trial level at these time  
653 resolutions (16ms bins) is dominated by spike-count variability, and the same models that

654 explained on average 94% of the variance in the SDF averaged across trials (Fig. **2C**)  
655 explain a mean of 9.8% VE (Fig. **2D**). Furthermore, to determine the “unique” effect of  
656 different task-related and task-unrelated events on the spiking activity, we estimated the  
657 “unique variance” as defined by Musall, Kaufmann et al.<sup>20</sup>. This metric was devised to  
658 account for the fact that many predictors in the model are correlated. It is the variance  
659 explained by each class of regressors by computing the %VE for a reduced model  
660 obtained by shuffling in time only the regressors under consideration leaving all the others  
661 intact and subtracting this from the %VE of the full model. Note that by shuffling rather  
662 than eliminating a given regressor, the resulting model will have the same amount of  
663 parameters as the full model and thus, if the regressor contained no additional (or  
664 “unique”) information to predict the neural response, it would result in the same %VE, The  
665 resulting difference ( $\Delta$  %VE) thus gives a measure of the predictive power unique to each  
666 regressor<sup>20</sup>.

667

### 668 *Movement and Attention Index*

669 To determine periods with movement (Fig. **3**) we used the motion matrix  $M$  (see section  
670 *Motion decomposition*) for the face and body, where  $M$  is the absolute pixel-wise  
671 difference between two consecutive video frames (number of the pixels in the ROI  $\times$   
672 number of the video frames minus 1). We then averaged  $M$  over pixels to compute the  
673 average motion versus time  $\overline{M}_t$  (1x number of frames minus 1). Periods with movement  
674 were defined as those when  $\overline{M}_t$  exceeded the 80th percentile across all time-points of  $\overline{M}_t$   
675 in either the face or body view, while periods without movement were defined as those  
676 for which  $\overline{M}_t$  was below its median across all time-points, in either the face or body view.  
677 (We note that we confirmed that the results were qualitatively similar when we used  $\overline{M}_t$   
678 from only the body view or only the face view, indicating that neither type of movement  
679 had a sizable effect on  $MI$ .) We calculated the movement index ( $MI$ ) and attention index  
680 ( $AI$ ) based on the average spike rates ( $R$ ; computed after removing non-stationarities  
681 across the recording session using the drift-term of the linear regression model described  
682 below) from 0.15-2sec after stimulus onset, as

$$683 \quad MI = \frac{R_{with\ movement} - R_{without\ movement}}{R_{with\ movement} + R_{without\ movement}} \quad \text{and} \quad AI = \frac{R_{attention\ in} - R_{attention\ out}}{R_{attention\ in} + R_{attention\ out}}.$$

684 We computed the spike density functions (Fig. **3A**) by convolving peri-stimulus time  
685 histograms (1ms resolution) for each unit with a temporal smoothing function (half  
686 Gaussian function; standard deviation 30ms) and averaging this across units.

687

### 688 *Dataset*

689 Our dataset consists of a total of 1407 units: 1139 units from M1 recorded in 54 sessions  
690 and 268 units from M2 recorded in 5 sessions. We excluded 507 units from the analysis

691 that failed to meet the following criteria: (1) a minimum mean firing of 2 spks/s during  
692 stimulus presentations epochs in each of the four quartiles of the session, and (2) a  
693 minimum of 0 %VE of the full model during both retinal input controlled and uncontrolled  
694 epochs. Among the remaining 900 units, 653 units were from M1 (V1 - 269, V2 - 143,  
695 V3/V3A - 198) and 247 units were from M2 (V1 - 24, V2 - 108, V3/V3A - 114). Results  
696 were qualitatively similar when the minimum firing rate criterion was relaxed to include  
697 1343 units in the model (Supplementary Fig. **S6**). For the model-free analysis in Fig. **3**,  
698 we only used the first criterion, avoiding sub-selection of units based on model-fits. We  
699 did not assign visual areas to 44 units recorded in three sessions from M1 in which the  
700 receptive location and size were not consistent with the overall topography of the offline  
701 receptive field map as to unambiguously assign the recording sites but included them  
702 when data were combined across areas.

703

#### 704 *Statistical tests*

705 We used nonparametric permutation tests<sup>59</sup> to test for group-level significance of  
706 individual measures, unless otherwise specified. This was done by randomly switching  
707 the condition labels of individual observations between the two paired sets of values in  
708 each permutation. After repeating this procedure 10,000 times, we computed the  
709 difference between the two group means on each permutation and obtained the P value  
710 as the fraction of permutations that exceeded the observed difference between the  
711 means. All P values reported were computed using two-sided tests unless otherwise  
712 specified.

713

714

715

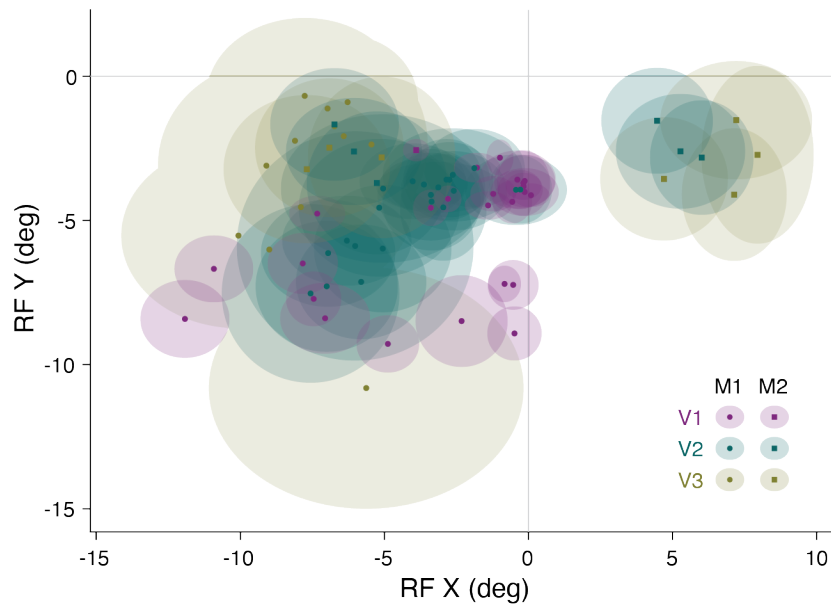

716

717

718

719

720

721

722

**Fig. S1 Receptive Field distribution.** The average receptive field centers and widths (shaded ellipses) for each session and area are plotted for animal M1 (circles) and animal M2 (squares). The median eccentricity of the receptive fields of the recorded units for V1 was 5.7° (operculum: 4.2° ranging from 2.9° to 7.3°; calcarine sulcus: 10.3°, ranging from 8.2° to 15.1°), 6.2° (range: 3.4° to 11.5°) for V2 and 7.9° (range: 3.1° to 14.0°) for V3/V3A.

723

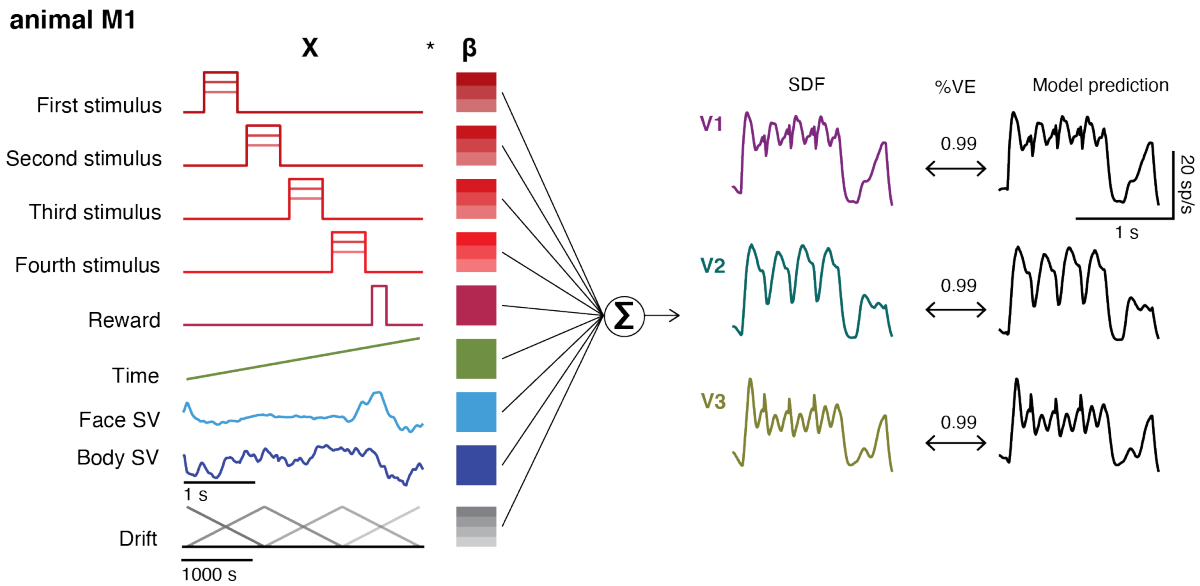

724

725

726

727

728

729

**Fig. S2 Schematic of the linear encoding model for animal M1.** Linear encoding model predicts neural firing in visual cortex (the predictors, labels left, are for the task used in M1). The three traces show peristimulus spike-density function for example units in V1, V2, and V3/V3A (left) recorded in M1, the model predictions (right), and the variance explained by these predictions (center).

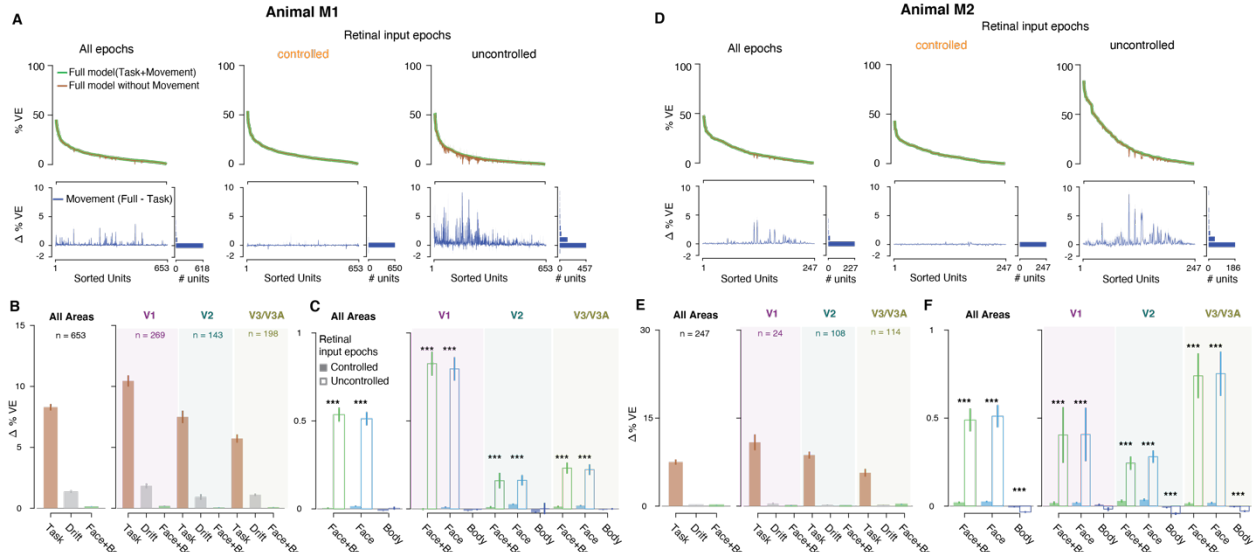

730  
 731 **Fig. S3 Linear encoding model fits, separately for animals M1(A, B, C) and M2 (D, E, F).** (A,  
 732 **D)** Top: Variance explained by the model with (green), and without (brown) movement covariates  
 733 for all epochs (left), and separately for epochs when retinal input was controlled (middle), and not  
 734 controlled (right) for all units. Bottom: Difference in variance explained by the two models. Units  
 735 are sorted according to the variance explained by the full model. **(B, E)** Unique variance explained  
 736 by different covariates towards the full model, for units across all areas (left), and separated by  
 737 area (right). **(C, F)** Unique variance explained by covariates. Format as in **Fig. 2**. For M1: during  
 738 controlled retinal input epochs (**A**, middle), 3% of units (V1: 15/269, V2: 10/143, V3/V3A: 6/198),  
 739 and during uncontrolled retinal input epochs, (**A**, right), 55% of units cross the threshold of  $\Delta\%VE$   
 740  $> 0.1$  (V1: 232/269, V2: 67/143, V3/V3A: 108/198); for M2: during controlled retinal input epochs  
 741 (**D**, middle), 6% of units (V1: 0/24, V2: 6/108, V3/V3A: 7/114), and during uncontrolled retinal input  
 742 epochs, (**D**, right), 66% of units cross the threshold (V1: 14/24, V2: 64/108, V3/V3A: 83/114).



Unique contribution towards spiking activity during uncontrolled retinal input

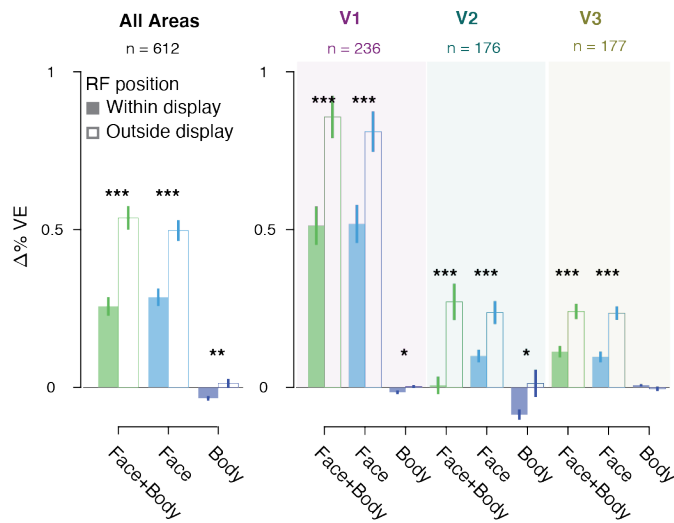

743

744 **Fig. S4 Movements have minimal effect on neural activity after controlling for eye**

745 **movements in epochs when the animals do not maintain visual fixation.** Unique variance

746 explained by different covariates towards the full model during uncontrolled retinal input (open

747 bars in **Fig. 2G**). Unique variance was computed separately for time-points when the receptive

748 field (RF) of the unit was on the monitor showing a gray screen (shaded bars; time-points when

749 retinal input could be inferred), and when the receptive field was outside the boundaries of the

750 monitor (open bars; time-points when retinal input could not be inferred). The criterion for defining

751 whether the RF was on the monitor was that the center of the RF + twice its width was within the

752 monitor edges along the horizontal and vertical dimension. In addition to our general inclusion

753 criteria (see Methods) we required that for each unit the ratio of the number of time-points for

754 which the retinal input could be inferred vs the number of time-points when it could not be inferred,

755 and vice-versa, was at least 10%. This was done to ensure that there were enough time-points

756 for computing unique variance, but our conclusions do not depend on incorporating this additional

757 criterion. Format as in **Fig. 2E**.

758

### Using 200 Face and Body SVs

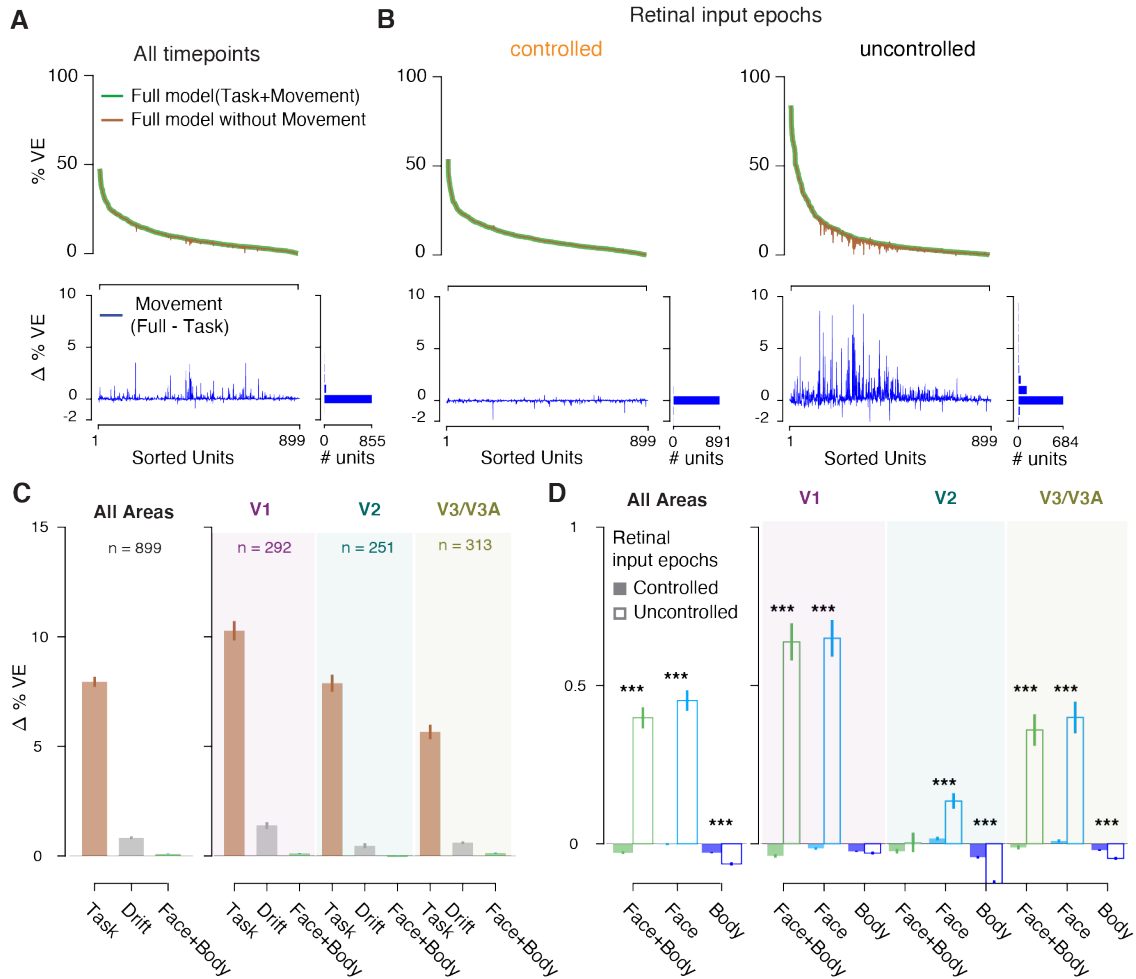

759

760

761

762

763

**Fig. S5 Linear encoding model fits, using 200 face and body components.** Format as in **Fig. 2**. Increasing the number of SV components from face and body videos in the linear encoding model to 200 from 30 (**Fig. 2**) did not increase the variance explained by spontaneous movements.

### Applying a lenient criteria for Unit selection

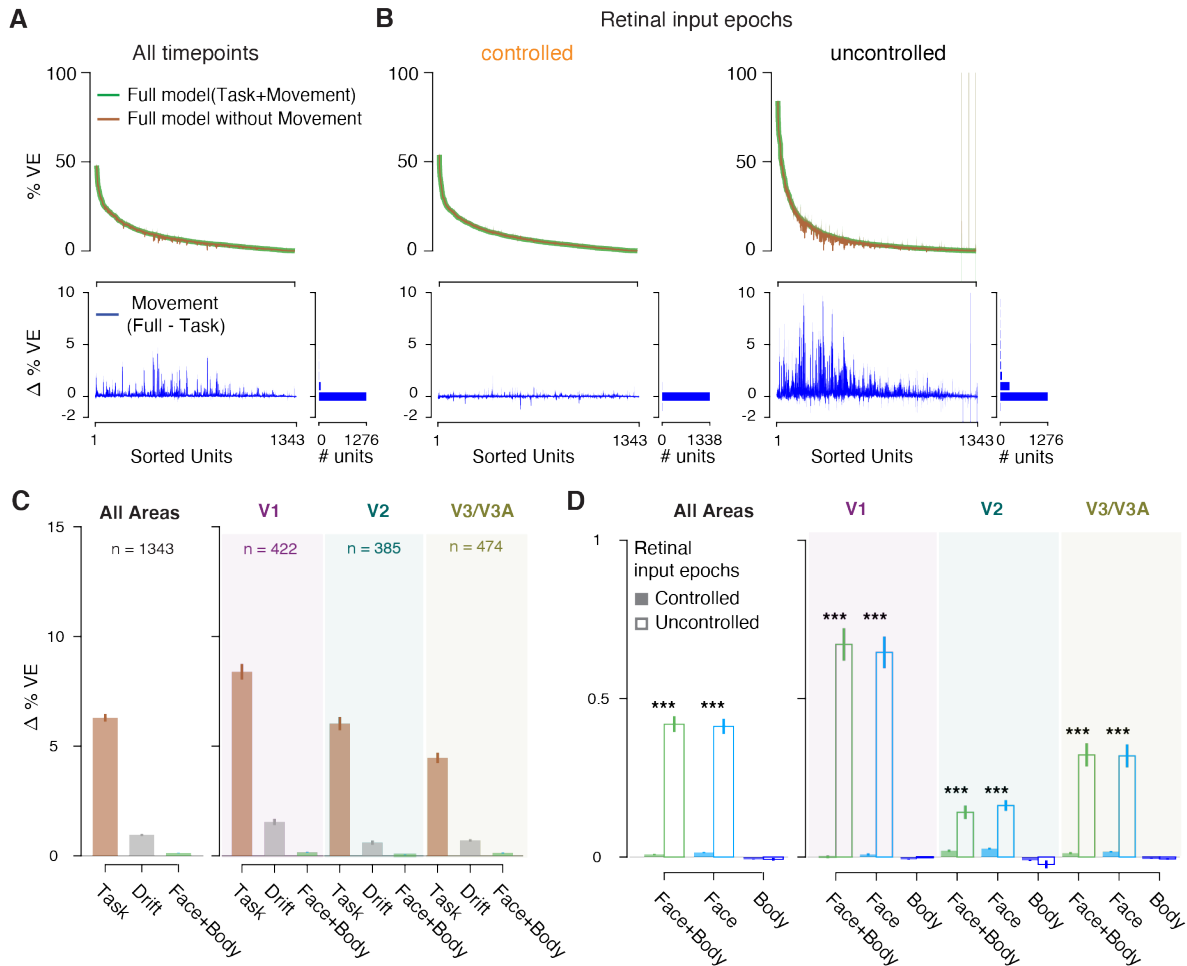

764  
 765  
 766

**Fig. S6 Linear encoding model fits, using a lenient criterion for unit selection.** Format as in Fig. 2. We used all units for which the % VE by the full model was > 0 (see Methods).

767 **Movie S1.**

768 Example video clip showing typical spontaneous movements of one of the animals (M1) during a  
 769 recording session. The labels of the body parts (obtained using DeepLabCut<sup>60</sup>) are only included  
 770 for demonstration purposes here but not used for our analysis.

771

772

| Threshold (% ΔVE) | Controlled Retinal input | Uncontrolled retinal input | P-value ( $\chi^2$ test) |
|-------------------|--------------------------|----------------------------|--------------------------|
| All areas         |                          |                            |                          |
| 0                 | 549/900; 61%             | 768/900; 85%               | < 10 <sup>-16</sup>      |
| 0.05              | 172/900; 19%             | 697/900; 77%               | < 10 <sup>-16</sup>      |
| 0.1               | 48/900; 5%               | 606/900; 67%               | < 10 <sup>-16</sup>      |
| 0.5               | 1/900; 0.1%              | 252/900; 28%               | < 10 <sup>-16</sup>      |
| 1                 | 0/900; 0%                | 125/900; 14%               | < 10 <sup>-16</sup>      |
| V1                |                          |                            |                          |
| 0                 | 159/293; 54%             | 281/293; 96%               | < 10 <sup>-16</sup>      |
| 0.05              | 42/293; 14%              | 268/293; 91%               | < 10 <sup>-16</sup>      |
| 0.1               | 15/293; 5%               | 246/293; 84%               | < 10 <sup>-16</sup>      |
| 0.5               | 1/293; 0.3%              | 132/293; 45%               | < 10 <sup>-16</sup>      |
| 1                 | 0/293; 0%                | 67/293; 23%                | < 10 <sup>-16</sup>      |
| V2                |                          |                            |                          |
| 0                 | 160/251; 64%             | 168/251; 67%               | 0.45                     |
| 0.05              | 59/251; 24%              | 145/251; 58%               | 10 <sup>-15</sup>        |
| 0.1               | 16/251; 6%               | 131/251; 52%               | < 10 <sup>-16</sup>      |
| 0.5               | 0/251; 0%                | 35/251; 23%                | 10 <sup>-9</sup>         |
| 1                 | 0/251; 0%                | 15/251; 6%                 | 10 <sup>-4</sup>         |
| V3/V3A            |                          |                            |                          |
| 0                 | 211/312; 68%             | 277/312; 89%               | 10 <sup>-10</sup>        |
| 0.05              | 64/312; 20%              | 242/312; 78%               | < 10 <sup>-16</sup>      |
| 0.1               | 13/312; 4%               | 191/312; 61%               | < 10 <sup>-16</sup>      |
| 0.5               | 0/312; 0%                | 61/312; 20%                | 10 <sup>-16</sup>        |
| 1                 | 0/312; 0%                | 28/312; 9%                 | 10 <sup>-9</sup>         |

773

774 **Table S1** Proportion of units for which the unique variance of movements (Fig 2E) exceeds  
 775 different thresholds of unique variance. P-values compare the proportions between controlled  
 776 and uncontrolled retinal input epochs using a chi-square test.

777

778

779 **Methods and Supplementary Information References:**

780

781 52. Quinn, K. R., Seillier, L., Butts, D. A. & Nienborg, H. Decision-related feedback in visual  
782 cortex lacks spatial selectivity. *Nat. Commun.* **12**, 4473 (2021).

783 53. Seillier, L. *et al.* Serotonin Decreases the Gain of Visual Responses in Awake Macaque V1.  
784 *J. Neurosci.* **37**, 11390–11405 (2017).

785 54. Eastman, K. & Huk, A. PLDAPS: A Hardware Architecture and Software Toolbox for  
786 Neurophysiology Requiring Complex Visual Stimuli and Online Behavioral Control. *Front.*  
787 *Neuroinformatics* **6**, (2012).

788 55. Kleiner, M. *et al.* What's new in Psychtoolbox-3. *Perception* **36**, 1–16 (2007).

789 56. Anzai, A., Chowdhury, S. A. & DeAngelis, G. C. Coding of Stereoscopic Depth Information  
790 in Visual Areas V3 and V3A. *J. Neurosci.* **31**, 10270–10282 (2011).

791 57. Steinmetz, N. A. *et al.* Neuropixels 2.0: A miniaturized high-density probe for stable, long-  
792 term brain recordings. *Science* **372**, eabf4588 (2021).

793 58. Cowley, B. R. *et al.* Slow Drift of Neural Activity as a Signature of Impulsivity in Macaque  
794 Visual and Prefrontal Cortex. *Neuron* **108**, 551-567.E8 (2020).

795 59. Efron, B. & Tibshirani, R. Bootstrap Methods for Standard Errors, Confidence Intervals, and  
796 Other Measures of Statistical Accuracy. *Stat. Sci.* **1**, 54–75 (1986).

797 60. Mathis, A. *et al.* DeepLabCut: markerless pose estimation of user-defined body parts with  
798 deep learning. *Nat. Neurosci.* **21**, 1281–1289 (2018).
